# Supplementary material for: The impact of COVID-19 pandemic on the provision of ambulatory care for patients with chronic neurological diseases in Japan: evaluation of an administrative claims database
Source: bioRxiv or medRxiv preprint supplement (doi:10.1101/2021.05.10.21256951), 2021-05-10

**(A)**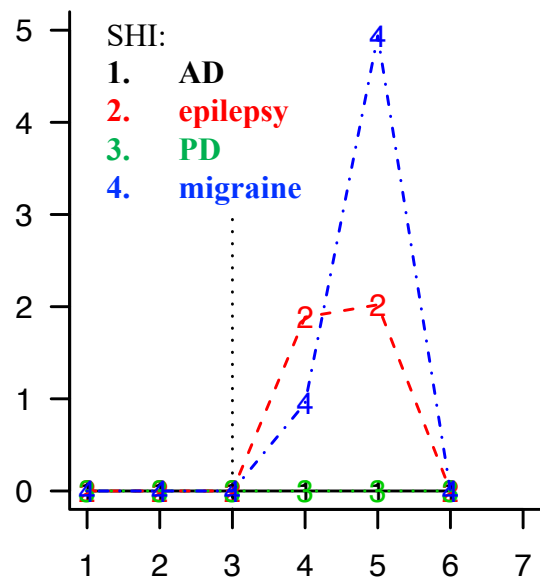**(B)**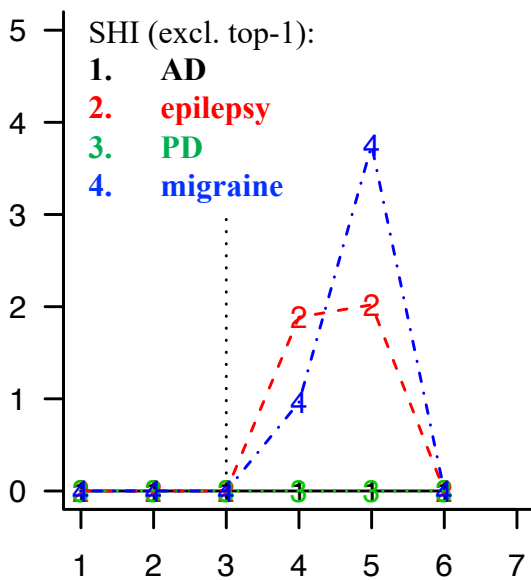**(C)**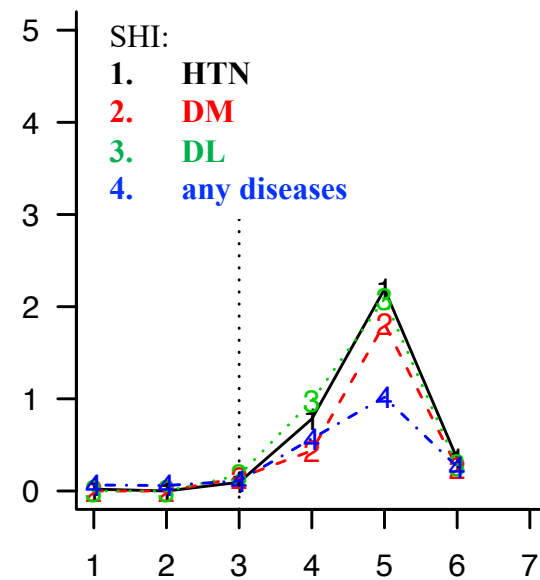**(D)**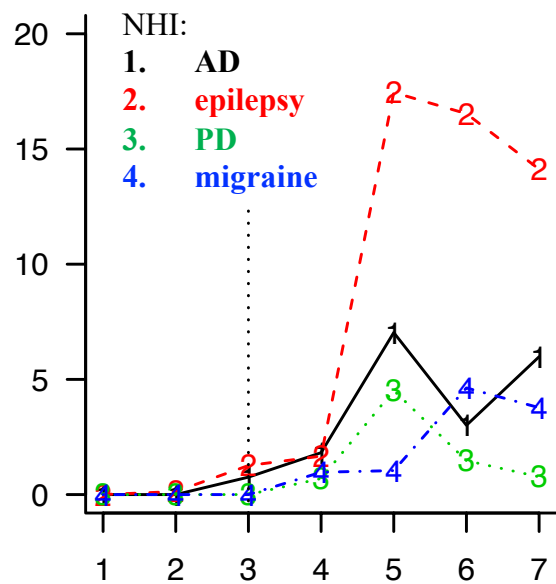**(E)**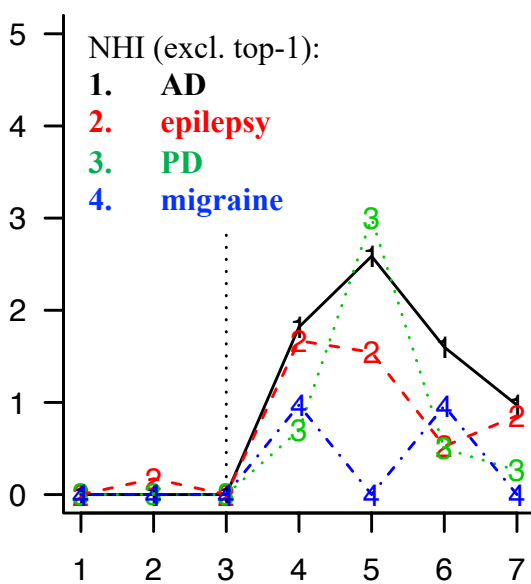**(F)**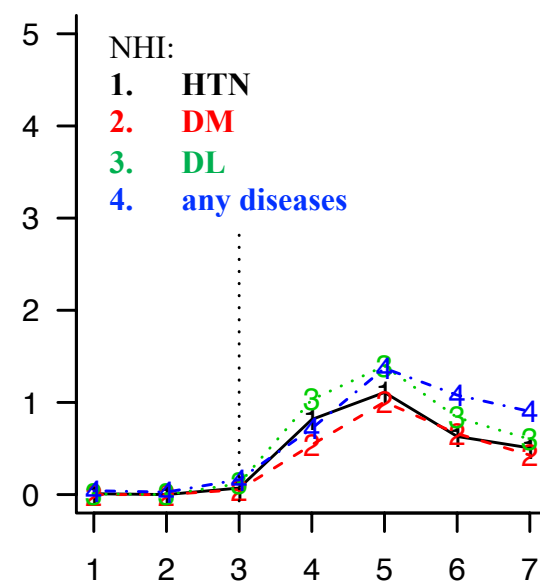

Supplement: Supplementary file [file media-1.pdf]
